# Supplementary material for: An Investigation of an Affordable Ventilation Retrofit to Improve the Indoor Air Quality in Australian Aged Care Homes
Source: Atypon-hosted journal article supplement (doi:10.1061/jaeied.aeeng-1700), 2024-05-17
Supplement: supplemental materials_jaeied.aeeng-1700_rajagopalan.pdf [file supplemental%20materials_jaeied.aeeng-1700_rajagopalan.pdf]

## SUPPLEMENTAL MATERIALS

*ASCE Journal of Architectural Engineering*

# An Investigation of an Affordable Ventilation Retrofit to Improve the Indoor Air Quality in Australian Aged Care Homes

Priyadarsini Rajagopalan, Jin Woo, and Mary Myla Andamon

**DOI:** 10.1061/JAEIED.AEENG-1700

© ASCE 2024

[www.ascelibrary.org](http://www.ascelibrary.org)

Table S1: Instrument Specifications

| Type of instrument                           | Parameter                           | Measuring range and accuracy                                                                                                                |
|----------------------------------------------|-------------------------------------|---------------------------------------------------------------------------------------------------------------------------------------------|
| Testo 480                                    | Air temperature (°C)                | 0 to +50°C, ±0.5°C                                                                                                                          |
|                                              | Relative humidity (%)               | 0 to 100RH%, ±(1.8RH% + 0.7% or measured value)                                                                                             |
|                                              | CO <sub>2</sub> concentration (ppm) | 0 to +10000, ±(75 ppm CO <sub>2</sub> + 3% of measured value)                                                                               |
|                                              | Globe temperature (°C)              | 0 to +120°C, Class 1                                                                                                                        |
|                                              | Air velocity (ms <sup>-1</sup> )    | 0 to +5ms <sup>-1</sup> , ±(0.03ms <sup>-1</sup> to 4% of measured value)                                                                   |
| HOBO MX1102                                  | Air temperature (°C)                | ±0.21°C from 0° to 50°C                                                                                                                     |
|                                              | Relative humidity (%)               | ±2% from 20% to 80%                                                                                                                         |
|                                              | CO <sub>2</sub> concentration (ppm) | ±50 ppm ±5% of reading at 25°C                                                                                                              |
| Aerocet Handheld Particle Counter Model 531S | PM2.5                               | ± 10%                                                                                                                                       |
|                                              | PM10                                | ± 10%                                                                                                                                       |
| TSI Dust Trak 8533 Aerosol Monitor           | PM2.5                               | Particle size range 0.1 to 15µm                                                                                                             |
|                                              | PM10                                | Aerosol concentration range 0.001 to 150 mg/m <sup>3</sup><br>Resolution ±0.1% of reading or 0.001 mg/m <sup>3</sup> (whichever is greater) |

Table S2- Descriptive statistics of CO<sub>2</sub> concentration across season 1 and seasons 2

| Room | <i>CO<sub>2</sub> concentration (ppm) Season 1</i> |      |     |      |         | <i>CO<sub>2</sub> concentration (ppm)Season 2</i> |      |     |      |         |
|------|----------------------------------------------------|------|-----|------|---------|---------------------------------------------------|------|-----|------|---------|
|      | Median                                             | Mean | Min | Max  | Std Dev | Median                                            | Mean | Min | Max  | Std Dev |
| AC1A | 517                                                | 524  | 362 | 859  | 61.6    | 499                                               | 502  | 330 | 821  | 64      |
| AC1B | 477                                                | 509  | 371 | 1499 | 127.4   | 467                                               | 494  | 381 | 1713 | 121.8   |
| AC2A | 471                                                | 487  | 379 | 1307 | 61.0    | 474                                               | 488  | 362 | 847  | 69.8    |
| AC2B | 472                                                | 498  | 360 | 870  | 80.7    | 481                                               | 505  | 366 | 900  | 84.2    |
| AC3A | 531                                                | 552  | 376 | 1058 | 92.4    | 506                                               | 541  | 367 | 1074 | 112.4   |
| AC3B | 472                                                | 497  | 360 | 870  | 80.7    | 507                                               | 542  | 348 | 1600 | 132     |
| AC4A | 521                                                | 554  | 376 | 1021 | 106.5   | 515                                               | 524  | 371 | 777  | 76      |
| AC4B | 561                                                | 583  | 371 | 1271 | 111.9   | 452                                               | 474  | 370 | 822  | 71.5    |
| AC5A | 537                                                | 547  | 371 | 986  | 71.8    | 481                                               | 502  | 373 | 843  | 77.4    |
| AC5B | 500                                                | 516  | 391 | 1033 | 72.7    | 484                                               | 488  | 319 | 736  | 59.1    |

Table S3- Descriptive statistics of CO<sub>2</sub> concentration across season 3 and seasons 4

| Room | <i>CO2 concentration (ppm) Season 3</i> |      |     |      |         | <i>CO2 concentration (ppm)Season 4</i> |      |     |      |         |
|------|-----------------------------------------|------|-----|------|---------|----------------------------------------|------|-----|------|---------|
|      | Median                                  | Mean | Min | Max  | Std Dev | Median                                 | Mean | Min | Max  | Std Dev |
| AC1A | 505                                     | 506  | 332 | 863  | 64      | 497                                    | 508  | 380 | 948  | 67.2    |
| AC1B | 463                                     | 487  | 341 | 1977 | 115.3   | 461                                    | 488  | 391 | 2066 | 123.7   |
| AC2A | 461                                     | 479  | 373 | 818  | 63.7    | 470                                    | 477  | 353 | 667  | 51.3    |
| AC2B | 476                                     | 497  | 361 | 898  | 78.5    | 470                                    | 498  | 385 | 728  | 74      |
| AC3A | 530                                     | 553  | 334 | 1291 | 105.5   | 506                                    | 532  | 360 | 1085 | 100.3   |
| AC3B | 494                                     | 534  | 358 | 1310 | 128.4   | 466                                    | 504  | 387 | 1158 | 102     |
| AC4A | 523                                     | 533  | 363 | 821  | 84.1    | 513                                    | 525  | 367 | 1127 | 82.8    |
| AC4B | 441                                     | 466  | 370 | 1036 | 77.5    | 446                                    | 475  | 380 | 1656 | 96.2    |
| AC5A | 502                                     | 516  | 342 | 1057 | 75.3    | 509                                    | 522  | 382 | 872  | 73.7    |
| AC5B | 487                                     | 496  | 353 | 1014 | 61.1    | 474                                    | 488  | 375 | 830  | 60      |
